# Supplementary material for: Fibrous red phosphorene: a promising two-dimensional optoelectronic and photocatalytic material with a desirable band gap and high carrier mobility
Source: Royal Society of Chemistry journal article supplement (doi:10.1039/d0cp01251c), 2020-01-01
Supplement: d0cp01251c1.pdf [file d0cp01251c1.pdf]

## *Supporting Information for*

# Fibrous Red Phosphorene: A Promising Two-dimensional Optoelectronic and Photocatalytic Material with Desirable Band Gap and High Carrier Mobility

Yi-Lin Lu,<sup>\*a</sup> Shengjie Dong,<sup>\*b</sup> Jiesen Li,<sup>c</sup> Yuanqing Wu,<sup>a</sup> Lu Wang,<sup>d</sup> and Hui Zhao<sup>e</sup>

<sup>a</sup> College of New Energy, Bohai University, Jinzhou 121007, China

<sup>b</sup> Faculty of Education and Sports, Guangdong Baiyun University, Guangzhou 510450, China

<sup>c</sup> School of Environment and Chemical Engineering, Foshan University, Foshan 528000, China

<sup>d</sup> School of Science, Inner Mongolia University of Science & Technology, Baotou 014010, China

<sup>e</sup> College of Physics and Materials Science, Tianjin Normal University, Tianjin 300387, China

### **This PDF file includes:**

Supplementary computational methods

Figures S1 to S8

Table S1

---

\*Corresponding authors

E-mail address: [yilinlu@tju.edu.cn](mailto:yilinlu@tju.edu.cn) (Y.-L. Lu)

E-mail address: [shengjiedong@tju.edu.cn](mailto:shengjiedong@tju.edu.cn) (S. Dong)

## Supplementary computational methods

The calculations were performed using the Vienna *Ab initio* Simulation Package (VASP) code, the projector-augmented plane wave (PAW) approach and the Perdew-Burke-Ernzerhof (PBE96) Generalized Gradient Approximation (GGA) density functional.<sup>1-4</sup> In this work, the cutoff energies of 500 eV was set for all compilations. The Brillouin zone was integrated using a regular *k*-point mesh with grid density of  $2\pi \times 0.02 \text{ \AA}^{-1}$ .<sup>5</sup> To achieve more accurate results, the hybrid functional method in the form of Heyd-Scuseria-Ernzerhof (HSE06)<sup>6</sup> is used, and the Grimme's van der Waals (vdW) correction was taken into account to capture the long-range vdW interaction.<sup>7</sup>

## References for Supplementary Information

- <sup>1</sup> G. Kresse and J. Hafner, *Phys. Rev. B*, 1993, **47**, R558.
- <sup>2</sup> G. Kresse and J. Hafner, *Phys. Rev. B*, 1994, **49**, 14251.
- <sup>3</sup> G. Kresse and J. Furthmüller, *Comput. Mater. Sci.*, 1996, **6**, 15.
- <sup>4</sup> J. P. Perdew, K. Burke and M. Ernzerhof, *Phys. Rev. Lett.*, 1996, **77**, 3865.
- <sup>5</sup> J. Monkhorst, J. Pack, *Phys. Rev. B*, 1976, **13**, 5188.
- <sup>6</sup> J. Heyd, G. E. Scuseria and M. Ernzerhof, *J. Chem. Phys.*, 2003, **118**, 8207.
- <sup>7</sup> S. Grimme, *J. Comput. Chem.*, 2006, **27**, 1787.

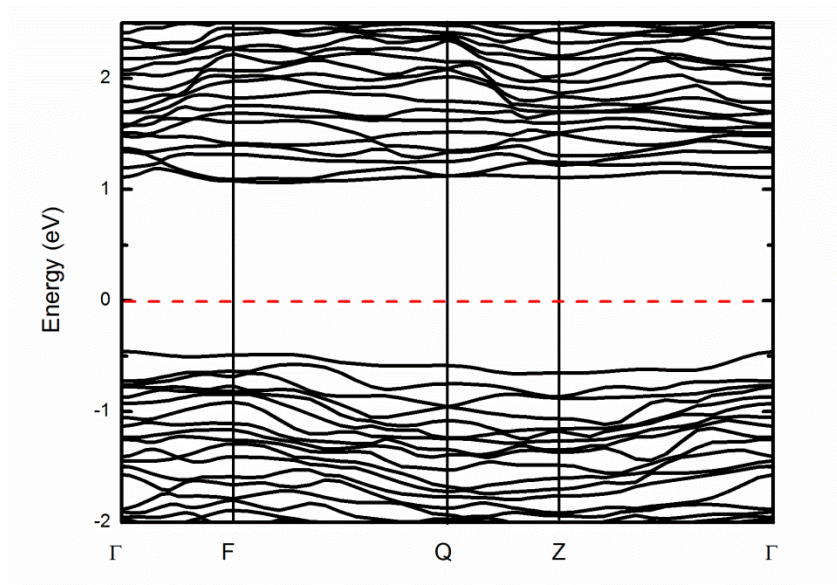

**Figure S1** Electronic band structure of bulk fibrous red phosphorus at PBE96 level.

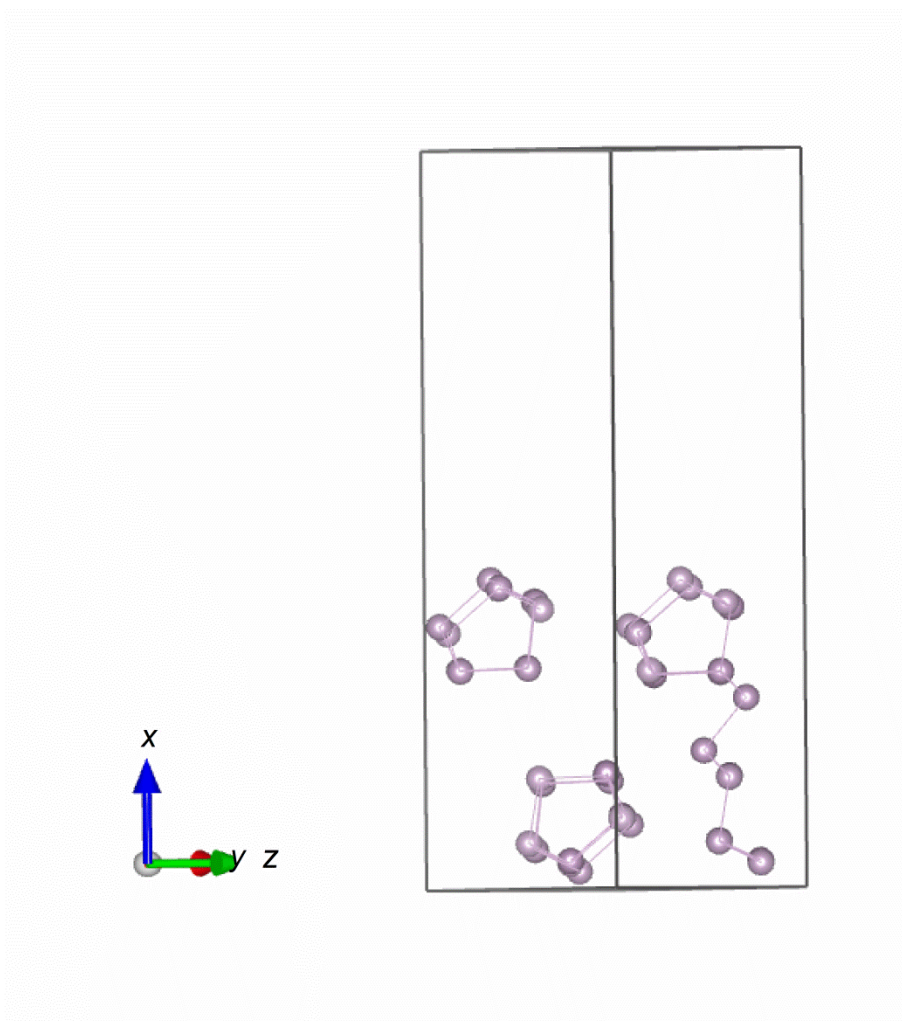

**Figure S2** Crystal structure of fibrous red phosphorene monolayer via exfoliating red phosphorus along the  $x$ -direction.

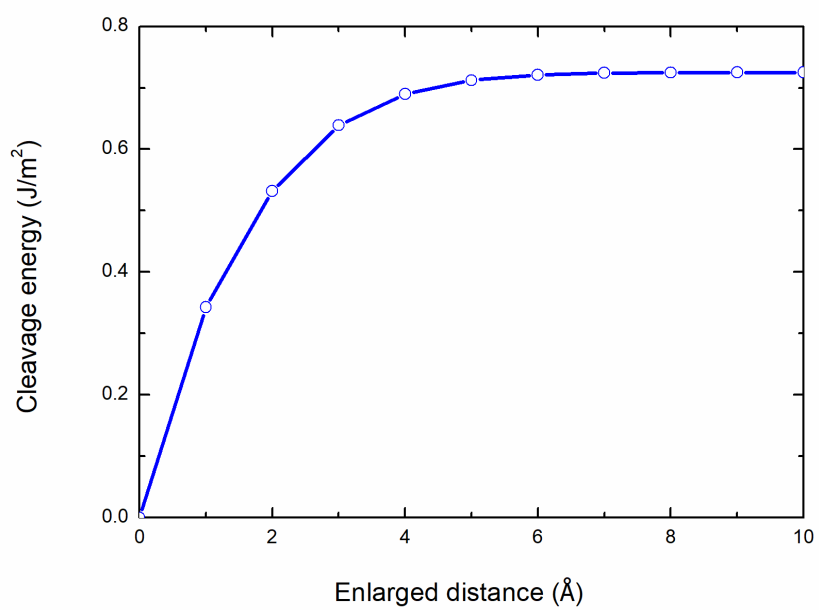

**Figure S3** Estimation of cleavage energy for monolayer fibrous red phosphorus along  $x$ -direction growth from its five-layered slab model.

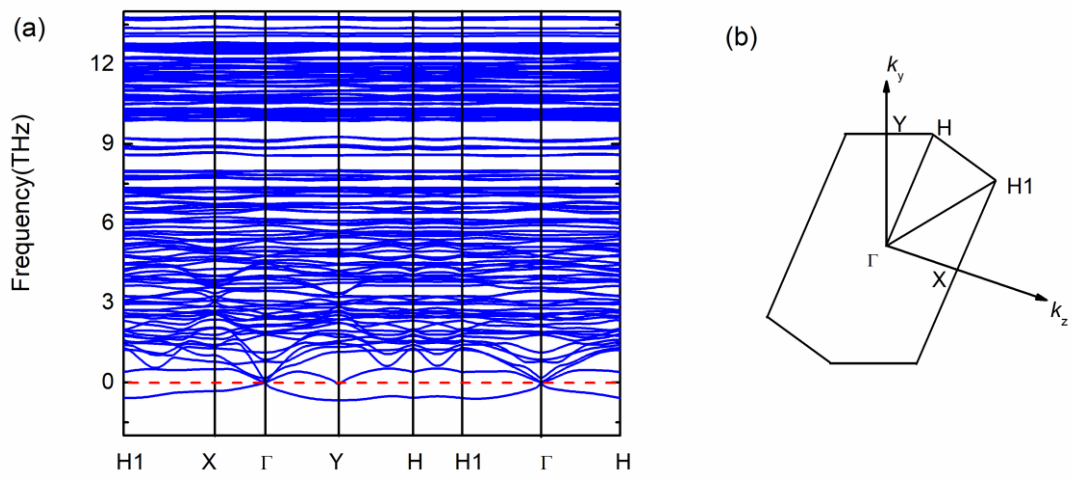

**Figure S4** (a) Phonon spectrum of fibrous red phosphorene monolayer along  $x$ -direction growth. (b) The first Brillouin zone of fibrous red phosphorene monolayer along  $x$ -direction growth.

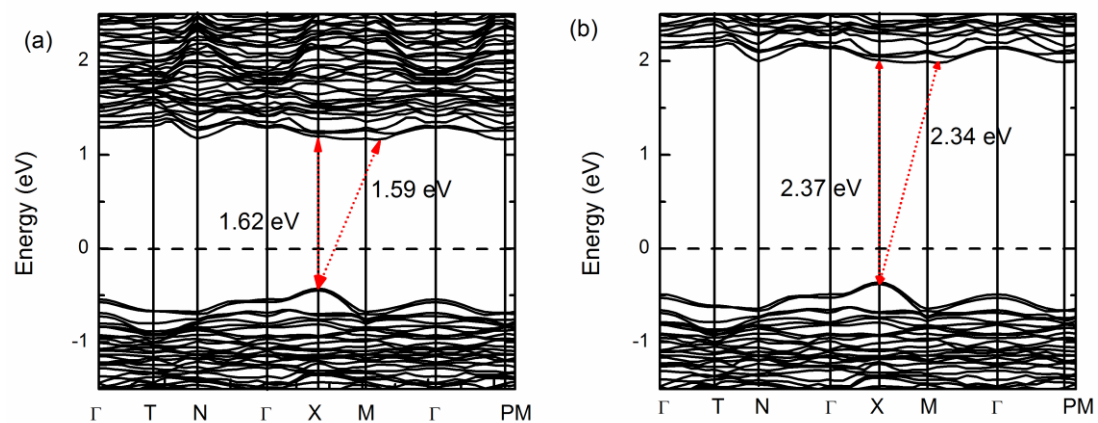

**Figure S5** Electronic band structures of fibrous red phosphorene bilayer using (a) standard PBE96 pure functional and (b) advanced HSE06 hybrid functional.

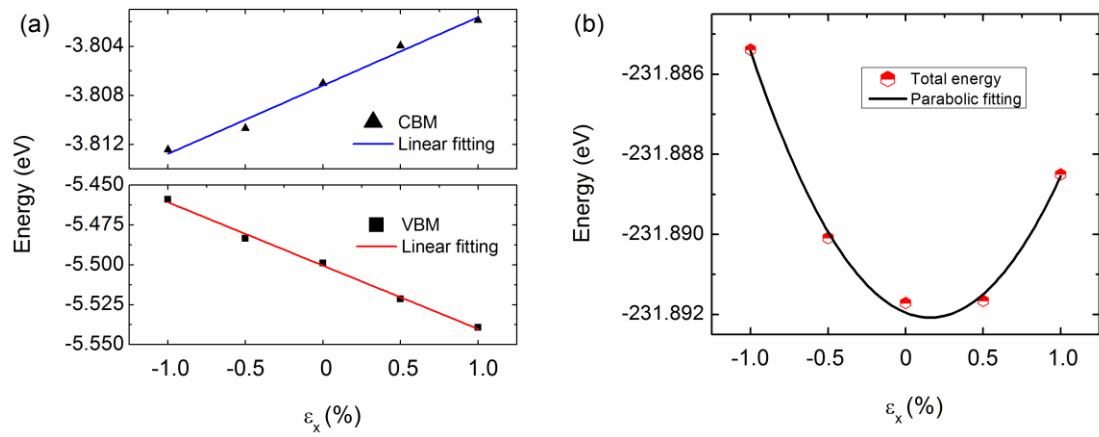

**Figure S6** (a) The CBM and VBM of fibrous red phosphorene monolayer with respect to uniaxial strain along the  $x$  direction. (b) The total energy of fibrous red phosphorene monolayer with respect to uniaxial strain along the  $x$  direction. The above data were obtained from the PBE96 functional.



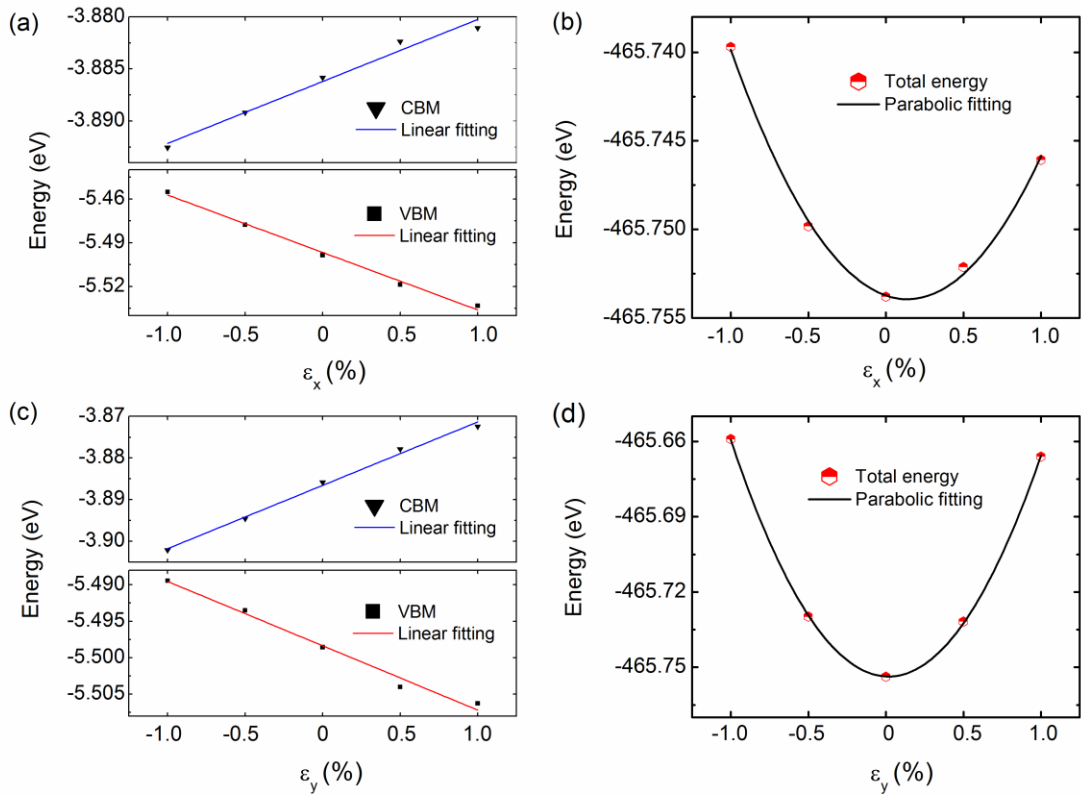

**Figure S7** (a) the CBM and VBM of fibrous red phosphorene bilayer with respect to uniaxial strain along the  $x$  direction. (b) The total energy of fibrous red phosphorene bilayer with respect to uniaxial strain along the  $x$  direction. (c) The CBM and VBM of fibrous red phosphorene bilayer with respect to uniaxial strain along the  $y$  direction, (d) the total energy of fibrous red phosphorene bilayer with respect to uniaxial strain along the  $x$  direction. The above data were obtained from the PBE96 functional.

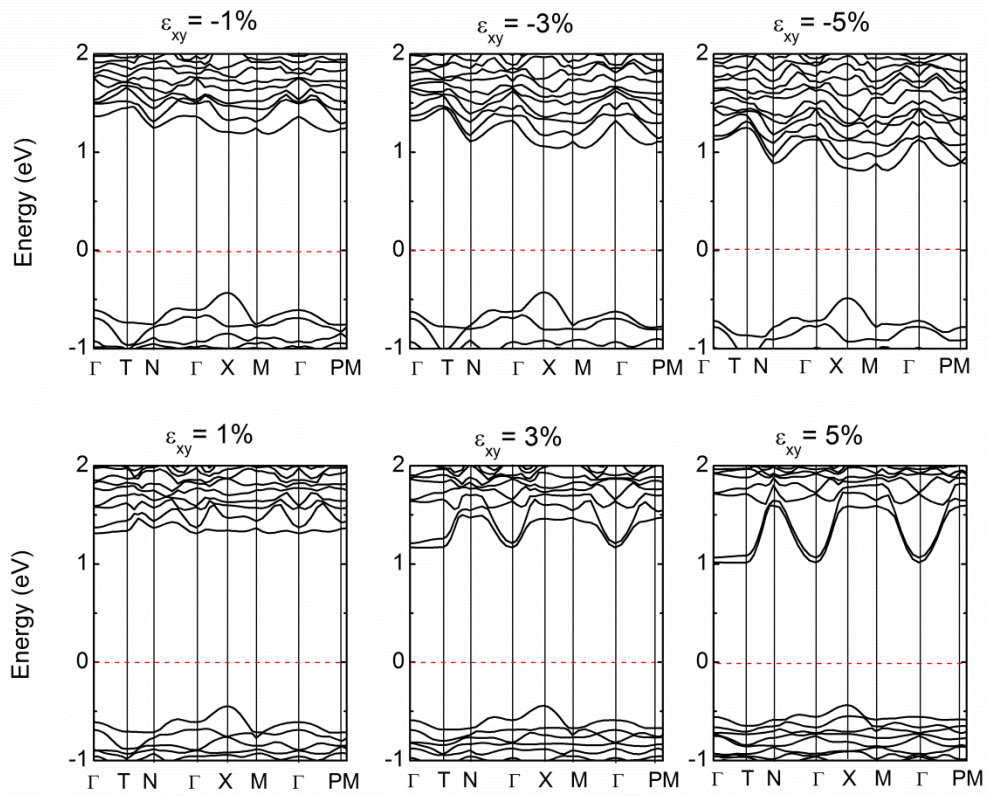

**Figure S8** Electronic band structures of fibrous red phosphorene monolayer upon different in-plane biaxial strains obtained from the PBE96 functional.

**Table S1** Predicted effective mass ( $m^*$ ), deformation potential ( $E_1$ , in eV), 2D elastic modulus ( $C^{2D}$ , in J/m<sup>2</sup>), and electron and hole mobility ( $\mu^{2D}$ , in 10<sup>3</sup> cm<sup>2</sup> V<sup>-1</sup> s<sup>-1</sup>) along the  $x$  and  $y$  directions for fibrous red phosphorene bilayer.

| Carrier<br>type | $m_x^* / m_0$ | $m_y^* / m_0$ | $E_{1x}$ | $E_{1y}$ | $C_{x\_2D}$ | $C_{y\_2D}$ | $\mu_{x\_2D}$ | $\mu_{y\_2D}$ |
|-----------------|---------------|---------------|----------|----------|-------------|-------------|---------------|---------------|
| electrons       | 0.43          | 0.58          | 3.94     | 0.88     | 21.82       | 183.16      | 0.14          | 17.2          |
| holes           | 2.95          | 0.44          | 0.60     | 1.52     | 21.82       | 183.16      | 0.39          | 3.37          |
